# Supplementary material
Source: Springer Nature journal article supplement (https://www.springermedizin.de/resource/supplementary/12885_2004_155_MOESM9_ESM.pdf/9469030)

| Number of gene (s) | 0            | 1             | 2             | 3             | 4             | 5             | 6             | 7           | 8           | 9           |
|--------------------|--------------|---------------|---------------|---------------|---------------|---------------|---------------|-------------|-------------|-------------|
| Astrocytoma (53)   | 7.55<br>(4)  | 5.66<br>(3)   | 13.21<br>(7)  | 18.87<br>(10) | 13.21<br>(7)  | 20.75<br>(11) | 11.32<br>(6)  | 3.77<br>(2) | 3.77<br>(2) | 1.89<br>(1) |
| Normal Tissue (3)  | 66.67<br>(2) | 33.33<br>(1)  | 0.00<br>(0)   | 0.00<br>(0)   | 0.00<br>(0)   | 0.00<br>(0)   | 0.00<br>(0)   | 0.00<br>(0) | 0.00<br>(0) | 0.00<br>(1) |
| Gene(s) at least   | 0            | 1             | 2             | 3             | 4             | 5             | 6             | 7           | 8           | 9           |
| Astrocytoma (53)   | 7.55<br>(4)  | 92.45<br>(49) | 86.79<br>(46) | 73.58<br>(39) | 54.72<br>(29) | 41.51<br>(22) | 20.75<br>(11) | 9.43<br>(5) | 5.66<br>(3) | 1.89<br>(1) |
| Normal Tissue (3)  | 66.67<br>(2) | 33.33<br>(1)  | 0.00<br>(0)   | 0.00<br>(0)   | 0.00<br>(0)   | 0.00<br>(0)   | 0.00<br>(0)   | 0.00<br>(0) | 0.00<br>(0) | 0.00<br>(0) |

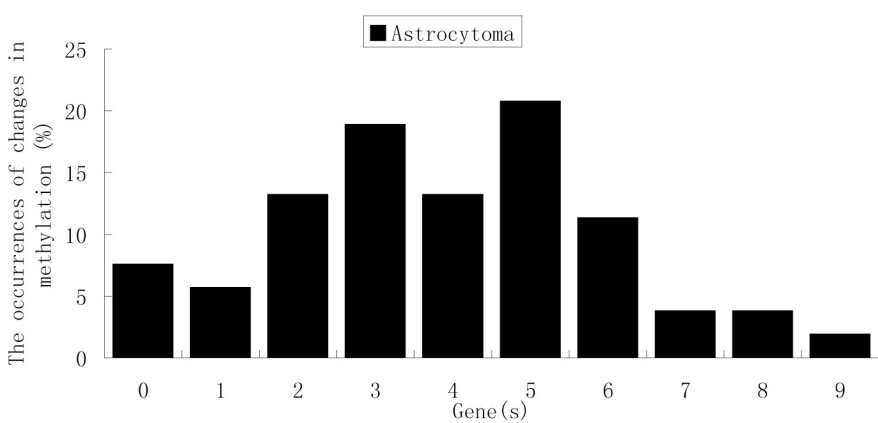

Supplement: MOESM9 [file 9469030]
